# Supplementary material for: Enteric neuronal cell therapy reverses architectural changes in a novel diphtheria toxin-mediated model of colonic aganglionosis
Source: PubMed Central journal article supplement (PMC6904570; doi:10.1038/s41598-019-55128-4), 2019-12-10

## **Supplementary information**

**Title-** Enteric neuronal cell therapy reverses architectural changes in a novel diphtheria toxin-mediated model of colonic aganglionosis

**Short title-** Rescue of diphtheria toxin-mediated intestinal aganglionosis

**Authors-** Sukhada Bhave, Emily Arciero, Corey Baker, Wing Lam Ho, Rhian Stavely, Allan M. Goldstein, Ryo Hotta\*

## **Legends of supplementary figures**

**Supplementary Figure 1. Focal ENS ablation is maintained for at least 3 months following DT injection in the colon.** Representative images showing loss of Hu immunostaining in colon cross sections of Wnt1-iDTR mice 3 months following DT injection (a). Control colon shows positive Hu staining in the myenteric ganglia (b, arrows).

Scale bar 100  $\mu\text{m}$  (a,b).

**Supplementary Figure 2. Focal ENS ablation results in increased crypt cell proliferation.** Ki67 staining shows a marked increase in epithelial cell proliferation in Wnt1-iDTR mice following DT injection.

Scale bar 50  $\mu\text{m}$  (a,b).

**Supplementary Movie 1.** Spatiotemporal mapping of motility in a control colon one month after DT injection.

**Supplementary Movie 2.** Spatiotemporal mapping of motility in Wnt1-iDTR colon one month after DT injection.

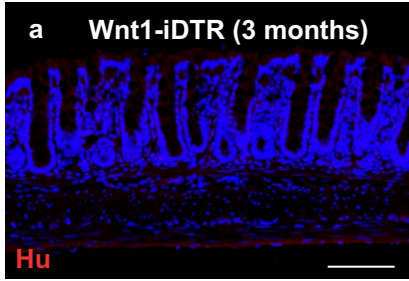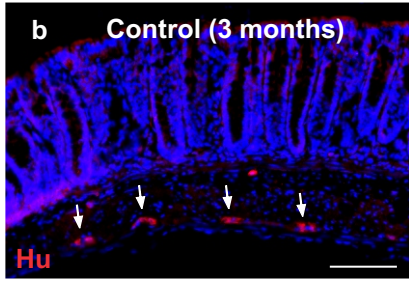

**a Ablated area**

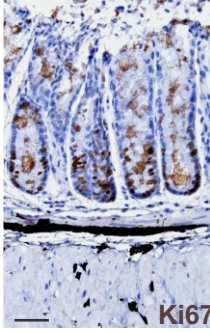

**b Non-ablated area**

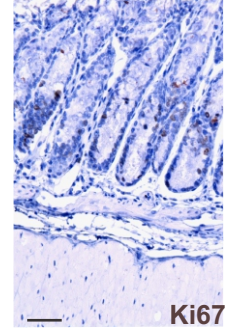

Supplement: 41598_2019_55128_MOESM1_ESM.pdf [file 41598_2019_55128_MOESM1_ESM.pdf]
